# Supplementary material for: Prevalence and incidence rates of laboratory-confirmed hepatitis B infection in South Africa, 2015 to 2019
Source: PubMed Central journal article supplement (PMC8739689; doi:10.1186/s12889-021-12391-3), 2022-01-06
Supplement: 12889_2021_12391_MOESM1_ESM.pdf [file 12889_2021_12391_MOESM1_ESM.pdf]

**Supplementary Table 1: Anti-HBc IgM thresholds for identification of acute hepatitis B cases**

| <b>Instrument platform</b> | <b>Anti-HBc IgM values indicative of a positive result</b> | <b>Recommended threshold*</b> |
|----------------------------|------------------------------------------------------------|-------------------------------|
| Abbott Architect           | 1 to 50                                                    | 20                            |
| Siemens Advia Centaur      | 1 to >9                                                    | ≥9                            |
| Beckman DXI                | 1 to 24                                                    | 5                             |
| Roche Cobas                | 1 to 50                                                    | 20                            |
| DiaSorin Liason            | 15 to 34                                                   | 20                            |

\*Anti-HBc IgM thresholds recommended by the Virology Expert Committee of the NHLS. Anti-HBc IgM values below the recommended thresholds were excluded from analyses of acute HBV cases as they were more likely to represent reactivation of infection or flares amongst chronic carriers
