# Supplementary material for: Prevalence and incidence rates of laboratory-confirmed hepatitis B infection in South Africa, 2015 to 2019
Source: PubMed Central journal article supplement (PMC8739689; doi:10.1186/s12889-021-12391-3), 2022-01-06
Supplement: 12889_2021_12391_MOESM2_ESM.pdf [file 12889_2021_12391_MOESM2_ESM.pdf]

Supplementary Table 2: Prevalence of HBV infection and HBsAg testing rates, 2015 to 2019

| Testing Year           | Prevalence (HBsAg positive cases) per 100,000 population |        |        |        |        |               |              |              | HBsAg testing rate per 100,000 population |         |         |         |         |                |              |              |
|------------------------|----------------------------------------------------------|--------|--------|--------|--------|---------------|--------------|--------------|-------------------------------------------|---------|---------|---------|---------|----------------|--------------|--------------|
|                        |                                                          |        |        |        |        | 2015 - 2019   |              |              |                                           |         |         |         |         | 2015 - 2019    |              |              |
|                        | 2015                                                     | 2016   | 2017   | 2018   | 2019   | Median        | Lower 95% CI | Upper 95% CI | 2015                                      | 2016    | 2017    | 2018    | 2019    | Median         | Lower 95% CI | Upper 95% CI |
| <b>Annual</b>          | 56.14                                                    | 71.85  | 74.17  | 62.81  | 67.76  | <b>67.76</b>  | 56.14        | 74.17        | 574.34                                    | 756.73  | 798.94  | 740.45  | 838.03  | <b>756.73</b>  | 574.34       | 838.03       |
| <b>Female</b>          | 49.33                                                    | 63.69  | 65.56  | 53.06  | 58.14  | <b>58.14</b>  | 49.33        | 65.56        | 682.18                                    | 902.25  | 950.22  | 875.55  | 1005.88 | <b>902.25</b>  | 682.18       | 1005.88      |
| <b>Male</b>            | 61.48                                                    | 78.14  | 81.06  | 71.13  | 75.26  | <b>75.26</b>  | 61.48        | 81.06        | 442.25                                    | 582.87  | 619.37  | 577.04  | 629.74  | <b>582.87</b>  | 442.25       | 629.74       |
| <b>Age Group 0-4</b>   | 3.66                                                     | 4.27   | 5.10   | 3.61   | 3.23   | <b>3.66</b>   | 3.23         | 5.10         | 79.45                                     | 83.19   | 82.80   | 83.70   | 84.39   | <b>83.19</b>   | 79.45        | 84.39        |
| <i>Female</i>          | 3.02                                                     | 3.90   | 4.95   | 3.15   | 2.83   | <b>3.15</b>   | 2.83         | 4.95         | 76.56                                     | 85.46   | 83.80   | 82.21   | 82.49   | <b>82.49</b>   | 76.56        | 85.46        |
| <i>Male</i>            | 4.07                                                     | 4.31   | 5.13   | 3.86   | 3.55   | <b>4.07</b>   | 3.55         | 5.13         | 76.57                                     | 76.22   | 77.32   | 80.67   | 80.63   | <b>77.32</b>   | 76.22        | 80.67        |
| <b>Age Group 5-9</b>   | 1.69                                                     | 1.91   | 1.95   | 1.08   | 0.98   | <b>1.69</b>   | 0.98         | 1.95         | 62.19                                     | 63.83   | 63.32   | 57.92   | 58.51   | <b>62.19</b>   | 57.92        | 63.83        |
| <i>Female</i>          | 1.60                                                     | 1.86   | 1.92   | 1.06   | 0.88   | <b>1.60</b>   | 0.88         | 1.92         | 68.92                                     | 71.76   | 70.64   | 66.86   | 66.64   | <b>68.92</b>   | 66.64        | 71.76        |
| <i>Male</i>            | 1.57                                                     | 1.93   | 1.87   | 1.00   | 1.03   | <b>1.57</b>   | 1.00         | 1.93         | 52.04                                     | 53.04   | 53.99   | 46.15   | 47.34   | <b>52.04</b>   | 46.15        | 53.99        |
| <b>Age Group 10-14</b> | 2.91                                                     | 2.99   | 3.49   | 2.05   | 2.40   | <b>2.91</b>   | 2.05         | 3.49         | 94.25                                     | 110.49  | 114.72  | 105.73  | 111.44  | <b>110.49</b>  | 94.25        | 114.72       |
| <i>Female</i>          | 3.74                                                     | 3.47   | 3.59   | 2.57   | 2.86   | <b>3.47</b>   | 2.57         | 3.74         | 115.86                                    | 142.10  | 146.27  | 139.29  | 146.47  | <b>142.10</b>  | 115.86       | 146.47       |
| <i>Male</i>            | 2.05                                                     | 2.48   | 3.32   | 1.43   | 1.75   | <b>2.05</b>   | 1.43         | 3.32         | 69.68                                     | 76.00   | 79.80   | 69.77   | 72.23   | <b>72.23</b>   | 69.68        | 79.80        |
| <b>Age Group 15-19</b> | 11.62                                                    | 13.57  | 14.29  | 10.61  | 11.67  | <b>11.67</b>  | 10.61        | 14.29        | 230.68                                    | 310.69  | 336.21  | 327.70  | 489.21  | <b>327.70</b>  | 230.68       | 489.21       |
| <i>Female</i>          | 16.81                                                    | 21.15  | 21.07  | 14.71  | 16.19  | <b>16.81</b>  | 14.71        | 21.15        | 352.52                                    | 478.84  | 514.83  | 498.74  | 765.84  | <b>498.74</b>  | 352.52       | 765.84       |
| <i>Male</i>            | 6.29                                                     | 5.64   | 7.29   | 6.30   | 6.70   | <b>6.30</b>   | 5.64         | 7.29         | 103.14                                    | 135.49  | 151.41  | 149.24  | 187.97  | <b>149.24</b>  | 103.14       | 187.97       |
| <b>Age Group 20-24</b> | 52.97                                                    | 65.54  | 60.68  | 43.03  | 44.87  | <b>52.97</b>  | 43.03        | 65.54        | 576.92                                    | 779.75  | 842.94  | 818.15  | 1077.00 | <b>818.15</b>  | 576.92       | 1077.00      |
| <i>Female</i>          | 69.35                                                    | 88.63  | 81.26  | 58.01  | 63.06  | <b>69.35</b>  | 58.01        | 88.63        | 908.89                                    | 1235.65 | 1335.43 | 1284.20 | 1689.03 | <b>1284.20</b> | 908.89       | 1689.03      |
| <i>Male</i>            | 35.04                                                    | 40.62  | 39.01  | 27.01  | 25.13  | <b>35.04</b>  | 25.13        | 40.62        | 235.48                                    | 311.19  | 337.14  | 334.82  | 428.78  | <b>334.82</b>  | 235.48       | 428.78       |
| <b>Age Group 25-29</b> | 90.76                                                    | 116.52 | 118.16 | 99.81  | 105.60 | <b>105.60</b> | 90.76        | 118.16       | 882.05                                    | 1195.29 | 1258.85 | 1185.89 | 1372.69 | <b>1195.29</b> | 882.05       | 1372.69      |
| <i>Female</i>          | 100.64                                                   | 129.96 | 133.84 | 114.89 | 120.61 | <b>120.61</b> | 100.64       | 133.84       | 1255.16                                   | 1716.84 | 1815.07 | 1710.18 | 1968.75 | <b>1716.84</b> | 1255.16      | 1968.75      |
| <i>Male</i>            | 78.36                                                    | 99.84  | 99.69  | 82.39  | 86.79  | <b>86.79</b>  | 78.36        | 99.84        | 498.40                                    | 658.98  | 692.49  | 646.14  | 746.20  | <b>658.98</b>  | 498.40       | 746.20       |
| <b>Age Group 30-34</b> | 119.92                                                   | 154.02 | 159.27 | 131.94 | 143.70 | <b>143.70</b> | 119.92       | 159.27       | 1113.15                                   | 1479.50 | 1561.27 | 1385.10 | 1508.19 | <b>1479.50</b> | 1113.15      | 1561.27      |
| <i>Female</i>          | 111.69                                                   | 145.03 | 155.64 | 122.28 | 132.37 | <b>132.37</b> | 111.69       | 155.64       | 1422.49                                   | 1885.92 | 2003.72 | 1767.42 | 1933.66 | <b>1885.92</b> | 1422.49      | 2003.72      |
| <i>Male</i>            | 125.32                                                   | 158.67 | 158.99 | 137.56 | 149.08 | <b>149.08</b> | 125.32       | 158.99       | 789.97                                    | 1055.59 | 1105.22 | 983.96  | 1052.32 | <b>1052.32</b> | 789.97       | 1105.22      |
| <b>Age Group 35-39</b> | 133.64                                                   | 170.81 | 174.06 | 155.00 | 163.96 | <b>163.96</b> | 133.64       | 174.06       | 1172.69                                   | 1541.31 | 1603.30 | 1470.01 | 1597.05 | <b>1541.31</b> | 1172.69      | 1603.30      |
| <i>Female</i>          | 103.84                                                   | 132.70 | 141.59 | 118.87 | 132.41 | <b>132.41</b> | 103.84       | 141.59       | 1321.33                                   | 1751.65 | 1836.13 | 1671.59 | 1842.51 | <b>1751.65</b> | 1321.33      | 1842.51      |
| <i>Male</i>            | 160.20                                                   | 204.60 | 201.84 | 185.90 | 190.17 | <b>190.17</b> | 160.20       | 204.60       | 997.14                                    | 1300.13 | 1337.80 | 1238.04 | 1310.26 | <b>1300.13</b> | 997.14       | 1337.80      |
| <b>Age Group 40-44</b> | 117.46                                                   | 154.29 | 165.09 | 146.97 | 153.46 | <b>153.46</b> | 117.46       | 165.09       | 1068.59                                   | 1445.49 | 1528.49 | 1360.90 | 1459.22 | <b>1445.49</b> | 1068.59      | 1528.49      |
| <i>Female</i>          | 82.12                                                    | 109.11 | 111.06 | 99.84  | 108.31 | <b>108.31</b> | 82.12        | 111.06       | 1111.90                                   | 1483.49 | 1546.81 | 1364.10 | 1503.61 | <b>1483.49</b> | 1111.90      | 1546.81      |
| <i>Male</i>            | 152.20                                                   | 197.62 | 217.97 | 192.40 | 194.36 | <b>194.36</b> | 152.20       | 217.97       | 1000.30                                   | 1375.45 | 1477.29 | 1323.97 | 1369.68 | <b>1369.68</b> | 1000.30      | 1477.29      |
| <b>Age Group 45-49</b> | 89.17                                                    | 121.51 | 127.10 | 113.84 | 120.83 | <b>120.83</b> | 89.17        | 127.10       | 893.37                                    | 1201.69 | 1266.06 | 1163.85 | 1236.56 | <b>1201.69</b> | 893.37       | 1266.06      |
| <i>Female</i>          | 58.24                                                    | 80.42  | 81.83  | 69.08  | 79.54  | <b>79.54</b>  | 58.24        | 81.83        | 869.98                                    | 1164.59 | 1222.25 | 1112.10 | 1189.00 | <b>1164.59</b> | 869.98       | 1222.25      |
| <i>Male</i>            | 123.92                                                   | 166.05 | 174.65 | 161.11 | 162.44 | <b>162.44</b> | 123.92       | 174.65       | 900.52                                    | 1219.17 | 1291.61 | 1192.13 | 1251.44 | <b>1219.17</b> | 900.52       | 1291.61      |
| <b>Age Group 50-54</b> | 66.39                                                    | 87.09  | 92.21  | 80.23  | 90.81  | <b>87.09</b>  | 66.39        | 92.21        | 754.14                                    | 1000.13 | 1041.77 | 941.27  | 1022.31 | <b>1000.13</b> | 754.14       | 1041.77      |
| <i>Female</i>          | 45.79                                                    | 62.72  | 63.87  | 51.20  | 58.14  | <b>58.14</b>  | 45.79        | 63.87        | 737.30                                    | 965.14  | 980.81  | 880.40  | 958.05  | <b>958.05</b>  | 737.30       | 980.81       |
| <i>Male</i>            | 90.17                                                    | 116.32 | 126.22 | 114.96 | 128.24 | <b>116.32</b> | 90.17        | 128.24       | 756.79                                    | 1023.15 | 1098.54 | 995.06  | 1073.46 | <b>1023.15</b> | 756.79       | 1098.54      |
| <b>Age Group 55-59</b> | 46.53                                                    | 61.32  | 65.17  | 56.63  | 63.76  | <b>61.32</b>  | 46.53        | 65.17        | 605.72                                    | 793.80  | 837.11  | 786.49  | 851.72  | <b>793.80</b>  | 605.72       | 851.72       |
| <i>Female</i>          | 31.40                                                    | 42.82  | 42.08  | 36.08  | 41.13  | <b>41.13</b>  | 31.40        | 42.82        | 570.57                                    | 736.24  | 769.77  | 719.86  | 790.78  | <b>736.24</b>  | 570.57       | 790.78       |
| <i>Male</i>            | 65.29                                                    | 84.06  | 94.15  | 82.26  | 91.81  | <b>84.06</b>  | 65.29        | 94.15        | 637.61                                    | 849.48  | 907.81  | 856.70  | 906.19  | <b>856.70</b>  | 637.61       | 907.81       |
| <b>Age Group 60+</b>   | 26.14                                                    | 31.33  | 34.05  | 27.68  | 29.57  | <b>29.57</b>  | 26.14        | 34.05        | 372.70                                    | 454.14  | 479.82  | 482.93  | 513.19  | <b>479.82</b>  | 372.70       | 513.19       |
| <i>Female</i>          | 17.97                                                    | 21.35  | 24.65  | 18.03  | 18.95  | <b>18.95</b>  | 17.97        | 24.65        | 322.94                                    | 394.72  | 412.77  | 412.90  | 442.71  | <b>412.77</b>  | 322.94       | 442.71       |
| <i>Male</i>            | 38.13                                                    | 45.78  | 47.46  | 41.84  | 45.37  | <b>45.37</b>  | 38.13        | 47.46        | 439.27                                    | 535.80  | 574.10  | 579.63  | 606.22  | <b>574.10</b>  | 439.27       | 606.22       |
| <b>Province</b>        |                                                          |        |        |        |        |               |              |              |                                           |         |         |         |         |                |              |              |
| <i>Eastern Cape</i>    | 61.66                                                    | 72.39  | 80.41  | 72.91  | 70.86  | <b>72.39</b>  | 61.66        | 80.41        | 689.35                                    | 813.35  | 881.39  | 813.92  | 859.04  | <b>813.92</b>  | 689.35       | 881.39       |
| <i>Free State</i>      | 56.28                                                    | 66.51  | 59.52  | 50.49  | 67.08  | <b>59.52</b>  | 50.49        | 67.08        | 603.16                                    | 734.48  | 731.19  | 636.06  | 760.87  | <b>731.19</b>  | 603.16       | 760.87       |
| <i>Gauteng</i>         | 74.74                                                    | 106.75 | 108.55 | 89.62  | 101.40 | <b>101.40</b> | 74.74        | 108.55       | 838.80                                    | 1237.12 | 1313.98 | 1175.42 | 1381.69 | <b>1237.12</b> | 838.80       | 1381.69      |
| <i>Kwazulu-Natal</i>   | 67.82                                                    | 77.17  | 67.81  | 63.91  | 71.16  | <b>67.82</b>  | 63.91        | 77.17        | 636.60                                    | 773.99  | 720.16  | 734.16  | 859.38  | <b>734.16</b>  | 636.60       | 859.38       |
| <i>Limpopo</i>         | 33.74                                                    | 41.75  | 53.82  | 28.01  | 20.59  | <b>33.74</b>  | 20.59        | 53.82        | 175.27                                    | 256.72  | 275.67  | 234.88  | 216.80  | <b>234.88</b>  | 175.27       | 275.67       |
| <i>Mpumalanga</i>      | 43.46                                                    | 69.40  | 87.96  | 63.56  | 66.61  | <b>66.61</b>  | 43.46        | 87.96        | 282.05                                    | 464.96  | 648.54  | 519.32  | 538.35  | <b>519.32</b>  | 282.05       | 648.54       |
| <i>North West</i>      | 33.39                                                    | 49.79  | 53.01  | 57.91  | 63.72  | <b>53.01</b>  | 33.39        | 63.72        | 308.56                                    | 523.72  | 602.98  | 646.98  | 719.42  | <b>602.98</b>  | 308.56       | 719.42       |
| <i>Northern Cape</i>   | 30.12                                                    | 31.29  | 30.90  | 33.64  | 31.02  | <b>31.02</b>  | 30.12        | 33.64        | 471.21                                    | 452.74  | 446.62  | 467.40  | 483.43  | <b>467.40</b>  | 446.62       | 483.43       |
| <i>Western Cape</i>    | 37.55                                                    | 38.13  | 38.97  | 35.62  | 36.00  | <b>37.55</b>  | 35.62        | 38.97        | 501.62                                    | 476.42  | 498.27  | 464.63  | 488.69  | <b>488.69</b>  | 464.63       | 501.62       |
