# Supplementary material for: Prevalence and incidence rates of laboratory-confirmed hepatitis B infection in South Africa, 2015 to 2019
Source: PubMed Central journal article supplement (PMC8739689; doi:10.1186/s12889-021-12391-3), 2022-01-06
Supplement: 12889_2021_12391_MOESM3_ESM.pdf [file 12889_2021_12391_MOESM3_ESM.pdf]

Supplementary Table 3: Annual HBsAg test positivity rates by gender, age group and province, 2015 to 2019

| Testing Year           | 2015 (%)     | 2016 (%)     | 2017 (%)     | 2018 (%)     | 2019 (%)     | 2015 - 2019  |              |              |                            |                                |                                   |
|------------------------|--------------|--------------|--------------|--------------|--------------|--------------|--------------|--------------|----------------------------|--------------------------------|-----------------------------------|
|                        |              |              |              |              |              | Median (%)   | Lower 95% CI | Upper 95% CI | Kendall's tau <sup>a</sup> | Kendall's p-value <sup>a</sup> | Mann-Whitney p-value <sup>b</sup> |
| <b>Annual</b>          | 9.77         | 9.49         | 9.28         | 8.48         | 8.09         | <b>9.28</b>  | 8.09         | 9.77         | -1.0                       | <b>0.0275*</b>                 | -                                 |
| <b>Female</b>          | 7.23         | 7.06         | 6.90         | 6.06         | 5.78         | <b>6.90</b>  | 5.78         | 7.23         | -1.0                       | <b>0.0275*</b>                 | <b>0.0079*</b>                    |
| <b>Male</b>            | 13.90        | 13.41        | 13.09        | 12.33        | 11.95        | <b>13.09</b> | 11.95        | 13.90        | -1.0                       | <b>0.0275*</b>                 | -                                 |
| <b>Age Group 0-4</b>   | 4.60         | 5.13         | 6.16         | 4.32         | 3.82         | <b>4.60</b>  | 3.82         | 6.16         | -0.4                       | 0.4624                         | -                                 |
| <i>Female</i>          | 3.94         | 4.56         | 5.91         | 3.83         | 3.43         | <b>3.94</b>  | 3.43         | 5.91         | -                          | -                              | 0.1508                            |
| <i>Male</i>            | 5.32         | 5.66         | 6.64         | 4.78         | 4.40         | <b>5.32</b>  | 4.40         | 6.64         | -                          | -                              | -                                 |
| <b>Age Group 5-9</b>   | 2.72         | 3.00         | 3.08         | 1.87         | 1.67         | <b>2.72</b>  | 1.67         | 3.08         | -0.4                       | 0.4624                         | -                                 |
| <i>Female</i>          | 2.32         | 2.59         | 2.72         | 1.59         | 1.33         | <b>2.32</b>  | 1.33         | 2.72         | -                          | -                              | 0.2222                            |
| <i>Male</i>            | 3.01         | 3.63         | 3.47         | 2.17         | 2.18         | <b>3.01</b>  | 2.17         | 3.63         | -                          | -                              | -                                 |
| <b>Age Group 10-14</b> | 3.08         | 2.71         | 3.05         | 1.94         | 2.15         | <b>2.71</b>  | 1.94         | 3.08         | -0.6                       | 0.2207                         | -                                 |
| <i>Female</i>          | 3.23         | 2.44         | 2.45         | 1.84         | 1.95         | <b>2.44</b>  | 1.84         | 3.23         | -                          | -                              | 0.3095                            |
| <i>Male</i>            | 2.94         | 3.26         | 4.17         | 2.05         | 2.43         | <b>2.94</b>  | 2.05         | 4.17         | -                          | -                              | -                                 |
| <b>Age Group 15-19</b> | 5.04         | 4.37         | 4.25         | 3.24         | 2.39         | <b>4.25</b>  | 2.39         | 5.04         | -1.0                       | <b>0.0275*</b>                 | -                                 |
| <i>Female</i>          | 4.77         | 4.42         | 4.09         | 2.95         | 2.11         | <b>4.09</b>  | 2.11         | 4.77         | -                          | -                              | 0.3095                            |
| <i>Male</i>            | 6.09         | 4.17         | 4.81         | 4.22         | 3.56         | <b>4.22</b>  | 3.56         | 6.09         | -                          | -                              | -                                 |
| <b>Age Group 20-24</b> | 9.18         | 8.41         | 7.20         | 5.26         | 4.17         | <b>7.20</b>  | 4.17         | 9.18         | -1.0                       | <b>0.0275*</b>                 | -                                 |
| <i>Female</i>          | 7.63         | 7.17         | 6.08         | 4.52         | 3.73         | <b>6.08</b>  | 3.73         | 7.63         | -                          | -                              | 0.0556                            |
| <i>Male</i>            | 14.88        | 13.05        | 11.57        | 8.07         | 5.86         | <b>11.57</b> | 5.86         | 14.88        | -                          | -                              | -                                 |
| <b>Age Group 25-29</b> | 10.29        | 9.75         | 9.39         | 8.42         | 7.69         | <b>9.39</b>  | 7.69         | 10.29        | -1.0                       | <b>0.0275*</b>                 | -                                 |
| <i>Female</i>          | 8.02         | 7.57         | 7.37         | 6.72         | 6.13         | <b>7.37</b>  | 6.13         | 8.02         | -                          | -                              | <b>0.0079*</b>                    |
| <i>Male</i>            | 15.72        | 15.15        | 14.40        | 12.75        | 11.63        | <b>14.40</b> | 11.63        | 15.72        | -                          | -                              | -                                 |
| <b>Age Group 30-34</b> | 10.77        | 10.41        | 10.20        | 9.53         | 9.53         | <b>10.20</b> | 9.53         | 10.77        | -0.8                       | 0.0864                         | -                                 |
| <i>Female</i>          | 7.85         | 7.69         | 7.77         | 6.92         | 6.85         | <b>7.69</b>  | 6.85         | 7.85         | -                          | -                              | <b>0.0079*</b>                    |
| <i>Male</i>            | 15.86        | 15.03        | 14.39        | 13.98        | 14.17        | <b>14.39</b> | 13.98        | 15.86        | -                          | -                              | -                                 |
| <b>Age Group 35-39</b> | 11.40        | 11.08        | 10.86        | 10.54        | 10.27        | <b>10.86</b> | 10.27        | 11.40        | -1.0                       | <b>0.0275*</b>                 | -                                 |
| <i>Female</i>          | 7.86         | 7.58         | 7.71         | 7.11         | 7.19         | <b>7.58</b>  | 7.11         | 7.86         | -                          | -                              | <b>0.0079*</b>                    |
| <i>Male</i>            | 16.07        | 15.74        | 15.09        | 15.02        | 14.51        | <b>15.09</b> | 14.51        | 16.07        | -                          | -                              | -                                 |
| <b>Age Group 40-44</b> | 10.99        | 10.67        | 10.80        | 10.80        | 10.52        | <b>10.80</b> | 10.52        | 10.99        | -0.6                       | 0.2207                         | -                                 |
| <i>Female</i>          | 7.39         | 7.35         | 7.18         | 7.32         | 7.20         | <b>7.32</b>  | 7.18         | 7.39         | -                          | -                              | <b>0.0079*</b>                    |
| <i>Male</i>            | 15.22        | 14.37        | 14.75        | 14.53        | 14.19        | <b>14.53</b> | 14.19        | 15.22        | -                          | -                              | -                                 |
| <b>Age Group 45-49</b> | 9.98         | 10.11        | 10.04        | 9.78         | 9.77         | <b>9.98</b>  | 9.77         | 10.11        | -0.6                       | 0.2207                         | -                                 |
| <i>Female</i>          | 6.69         | 6.91         | 6.69         | 6.21         | 6.69         | <b>6.69</b>  | 6.21         | 6.91         | -                          | -                              | <b>0.0079*</b>                    |
| <i>Male</i>            | 13.76        | 13.62        | 13.52        | 13.51        | 12.98        | <b>13.52</b> | 12.98        | 13.76        | -                          | -                              | -                                 |
| <b>Age Group 50-54</b> | 8.80         | 8.71         | 8.85         | 8.52         | 8.88         | <b>8.80</b>  | 8.52         | 8.88         | +0.2                       | 0.8065                         | -                                 |
| <i>Female</i>          | 6.21         | 6.50         | 6.51         | 5.82         | 6.07         | <b>6.21</b>  | 5.82         | 6.51         | -                          | -                              | <b>0.0079*</b>                    |
| <i>Male</i>            | 11.92        | 11.37        | 11.49        | 11.55        | 11.95        | <b>11.55</b> | 11.37        | 11.95        | -                          | -                              | -                                 |
| <b>Age Group 55-59</b> | 7.68         | 7.72         | 7.79         | 7.20         | 7.49         | <b>7.68</b>  | 7.20         | 7.79         | -0.2                       | 0.8065                         | -                                 |
| <i>Female</i>          | 5.50         | 5.82         | 5.47         | 5.01         | 5.20         | <b>5.47</b>  | 5.01         | 5.82         | -                          | -                              | <b>0.0079*</b>                    |
| <i>Male</i>            | 10.24        | 9.90         | 10.37        | 9.60         | 10.13        | <b>10.13</b> | 9.60         | 10.37        | -                          | -                              | -                                 |
| <b>Age Group 60+</b>   | 7.01         | 6.90         | 7.10         | 5.73         | 5.76         | <b>6.90</b>  | 5.73         | 7.10         | -0.4                       | 0.4624                         | -                                 |
| <i>Female</i>          | 5.56         | 5.41         | 5.97         | 4.37         | 4.28         | <b>5.41</b>  | 4.28         | 5.97         | -                          | -                              | <b>0.0079*</b>                    |
| <i>Male</i>            | 8.68         | 8.54         | 8.27         | 7.22         | 7.48         | <b>8.27</b>  | 7.22         | 8.68         | -                          | -                              | -                                 |
| <b>Age Group 15-49</b> | 10.29        | 10.11        | 10.04        | 9.53         | 9.53         | <b>10.04</b> | 9.53         | 10.29        | -                          | -                              | -                                 |
| <b>Female</b>          | <b>7.63</b>  | <b>7.35</b>  | <b>7.18</b>  | <b>6.72</b>  | <b>6.69</b>  | <b>7.18</b>  | <b>6.69</b>  | <b>7.63</b>  | -                          | -                              | -                                 |
| <b>Male</b>            | <b>15.22</b> | <b>14.37</b> | <b>14.39</b> | <b>13.51</b> | <b>12.98</b> | <b>14.37</b> | <b>12.98</b> | <b>15.22</b> | -                          | -                              | -                                 |
| <b>Province</b>        |              |              |              |              |              |              |              |              |                            |                                |                                   |
| <i>Eastern Cape</i>    | 8.95         | 8.90         | 9.12         | 8.96         | 8.25         | <b>8.95</b>  | 8.25         | 9.12         | -0.2                       | 0.8065                         | -                                 |
| <i>Free State</i>      | 9.33         | 9.05         | 8.14         | 7.94         | 8.82         | <b>8.82</b>  | 7.94         | 9.33         | -0.6                       | 0.2207                         | -                                 |
| <i>Gauteng</i>         | 8.91         | 8.63         | 8.26         | 7.62         | 7.34         | <b>8.26</b>  | 7.34         | 8.91         | -1.0                       | <b>0.0275*</b>                 | -                                 |
| <i>Kwazulu-Natal</i>   | 10.65        | 9.97         | 9.42         | 8.71         | 8.28         | <b>9.42</b>  | 8.28         | 10.65        | -1.0                       | <b>0.0275*</b>                 | -                                 |
| <i>Limpopo</i>         | 19.25        | 16.26        | 19.52        | 11.93        | 9.50         | <b>16.26</b> | 9.50         | 19.52        | -0.6                       | 0.2207                         | -                                 |
| <i>Mpumalanga</i>      | 15.41        | 14.93        | 13.56        | 12.24        | 12.37        | <b>13.56</b> | 12.24        | 15.41        | -0.8                       | 0.0864                         | -                                 |
| <i>North West</i>      | 10.82        | 9.51         | 8.79         | 8.95         | 8.86         | <b>8.95</b>  | 8.79         | 10.82        | -0.6                       | 0.2207                         | -                                 |
| <i>Northern Cape</i>   | 6.39         | 6.91         | 6.92         | 7.20         | 6.42         | <b>6.91</b>  | 6.39         | 7.20         | +0.4                       | 0.4624                         | -                                 |
| <i>Western Cape</i>    | 7.48         | 8.00         | 7.82         | 7.67         | 7.37         | <b>7.67</b>  | 7.37         | 8.00         | -0.4                       | 0.4624                         | -                                 |

<sup>a</sup> Kendall's tau and p-values of correlation analyses in trends of HBsAg test positivity rates over time

<sup>b</sup> Mann-Whitney p-values generated from comparison of HBsAg test positivity rates between females and males by age group

\*P-values < 0.05 in bold
