# Supplementary material for: Prevalence and incidence rates of laboratory-confirmed hepatitis B infection in South Africa, 2015 to 2019
Source: PubMed Central journal article supplement (PMC8739689; doi:10.1186/s12889-021-12391-3), 2022-01-06
Supplement: 12889_2021_12391_MOESM4_ESM.pdf [file 12889_2021_12391_MOESM4_ESM.pdf]

Supplementary Table 4: Incidence of acute HBV and anti-HBc IgM testing rates, 2015 to 2019

| Testing Year           | Incidence (anti-HBc IgM positive cases) per 100,000 population |      |      |      |      |             |             |              | Anti-HBc IgM testing rate per 100,000 population |        |        |        |        |               |             |              |
|------------------------|----------------------------------------------------------------|------|------|------|------|-------------|-------------|--------------|--------------------------------------------------|--------|--------|--------|--------|---------------|-------------|--------------|
|                        | 2015                                                           | 2016 | 2017 | 2018 | 2019 | 2015 - 2019 |             |              | 2015                                             | 2016   | 2017   | 2018   | 2019   | 2015 - 2019   |             |              |
|                        |                                                                |      |      |      |      | Median      | Lower 95%CI | Upper 95% CI |                                                  |        |        |        |        | Median        | Lower 95%CI | Upper 95% CI |
| <b>Annual</b>          | 3.17                                                           | 3.16 | 2.61 | 1.89 | 1.69 | <b>2.61</b> | 1.69        | 3.17         | 165.02                                           | 200.94 | 194.07 | 128.69 | 100.48 | <b>165.02</b> | 100.48      | 200.94       |
| <b>Female</b>          | 3.26                                                           | 3.35 | 2.61 | 1.88 | 1.62 | <b>2.61</b> | 1.62        | 3.35         | 186.84                                           | 226.84 | 218.29 | 136.67 | 103.36 | <b>186.84</b> | 103.36      | 226.84       |
| <b>Male</b>            | 2.96                                                           | 2.86 | 2.52 | 1.86 | 1.70 | <b>2.52</b> | 1.70        | 2.96         | 137.19                                           | 168.42 | 163.53 | 116.68 | 93.71  | <b>137.19</b> | 93.71       | 168.42       |
| <b>Age Group 0-4</b>   | 0.03                                                           | 0.05 | 0.03 | 0.05 | 0.07 | <b>0.05</b> | 0.03        | 0.07         | 23.64                                            | 20.91  | 22.57  | 19.39  | 18.49  | <b>20.91</b>  | 18.49       | 23.64        |
| <i>Female</i>          | 0.00                                                           | 0.04 | 0.04 | 0.11 | 0.04 | <b>0.04</b> | 0.00        | 0.11         | 23.41                                            | 21.28  | 22.26  | 18.32  | 16.92  | <b>21.28</b>  | 16.92       | 23.41        |
| <i>Male</i>            | 0.07                                                           | 0.07 | 0.03 | 0.00 | 0.10 | <b>0.07</b> | 0.00        | 0.10         | 22.63                                            | 19.93  | 22.05  | 19.36  | 19.39  | <b>19.93</b>  | 19.36       | 22.63        |
| <b>Age Group 5-9</b>   | 0.05                                                           | 0.04 | 0.05 | 0.02 | 0.00 | <b>0.04</b> | 0.00        | 0.05         | 15.61                                            | 15.03  | 13.95  | 9.48   | 8.99   | <b>13.95</b>  | 8.99        | 15.61        |
| <i>Female</i>          | 0.07                                                           | 0.04 | 0.04 | 0.04 | 0.00 | <b>0.04</b> | 0.00        | 0.07         | 16.73                                            | 16.72  | 14.92  | 9.91   | 9.40   | <b>14.92</b>  | 9.40        | 16.73        |
| <i>Male</i>            | 0.04                                                           | 0.04 | 0.07 | 0.00 | 0.00 | <b>0.04</b> | 0.00        | 0.07         | 13.67                                            | 12.81  | 12.55  | 8.75   | 8.35   | <b>12.55</b>  | 8.35        | 13.67        |
| <b>Age Group 10-14</b> | 0.06                                                           | 0.06 | 0.04 | 0.04 | 0.04 | <b>0.04</b> | 0.04        | 0.06         | 23.90                                            | 23.58  | 23.25  | 15.85  | 12.42  | <b>23.25</b>  | 12.42       | 23.90        |
| <i>Female</i>          | 0.00                                                           | 0.04 | 0.08 | 0.08 | 0.00 | <b>0.04</b> | 0.00        | 0.08         | 29.84                                            | 29.48  | 27.61  | 19.31  | 14.46  | <b>27.61</b>  | 14.46       | 29.84        |
| <i>Male</i>            | 0.13                                                           | 0.08 | 0.00 | 0.00 | 0.07 | <b>0.07</b> | 0.00        | 0.13         | 16.83                                            | 17.25  | 18.46  | 12.08  | 10.11  | <b>16.83</b>  | 10.11       | 18.46        |
| <b>Age Group 15-19</b> | 1.12                                                           | 1.16 | 1.06 | 0.74 | 0.41 | <b>1.06</b> | 0.41        | 1.16         | 62.34                                            | 72.65  | 69.47  | 43.27  | 33.61  | <b>62.34</b>  | 33.61       | 72.65        |
| <i>Female</i>          | 1.79                                                           | 1.86 | 1.61 | 1.18 | 0.73 | <b>1.61</b> | 0.73        | 1.86         | 91.44                                            | 109.34 | 102.05 | 62.03  | 45.16  | <b>91.44</b>  | 45.16       | 109.34       |
| <i>Male</i>            | 0.46                                                           | 0.47 | 0.47 | 0.30 | 0.09 | <b>0.46</b> | 0.09        | 0.47         | 32.06                                            | 34.50  | 35.54  | 23.82  | 20.73  | <b>32.06</b>  | 20.73       | 35.54        |
| <b>Age Group 20-24</b> | 8.04                                                           | 7.52 | 6.11 | 3.60 | 2.38 | <b>6.11</b> | 2.38        | 8.04         | 164.29                                           | 192.61 | 184.59 | 115.57 | 81.42  | <b>164.29</b> | 81.42       | 192.61       |
| <i>Female</i>          | 10.04                                                          | 9.11 | 7.38 | 4.47 | 3.08 | <b>7.38</b> | 3.08        | 10.04        | 246.25                                           | 294.01 | 282.67 | 168.20 | 113.46 | <b>246.25</b> | 113.46      | 294.01       |
| <i>Male</i>            | 5.58                                                           | 5.84 | 4.78 | 2.66 | 1.62 | <b>4.78</b> | 1.62        | 5.84         | 79.27                                            | 88.65  | 83.84  | 61.48  | 47.06  | <b>79.27</b>  | 47.06       | 88.65        |
| <b>Age Group 25-29</b> | 8.56                                                           | 8.93 | 7.17 | 5.02 | 5.61 | <b>7.17</b> | 5.02        | 8.93         | 239.02                                           | 301.96 | 294.43 | 187.39 | 133.78 | <b>239.02</b> | 133.78      | 301.96       |
| <i>Female</i>          | 8.92                                                           | 9.53 | 7.45 | 5.10 | 5.62 | <b>7.45</b> | 5.10        | 9.53         | 328.33                                           | 412.51 | 404.98 | 247.18 | 167.06 | <b>328.33</b> | 167.06      | 412.51       |
| <i>Male</i>            | 7.89                                                           | 8.07 | 6.58 | 4.88 | 5.52 | <b>6.58</b> | 4.88        | 8.07         | 147.03                                           | 187.98 | 180.78 | 125.43 | 97.05  | <b>147.03</b> | 97.05       | 187.98       |
| <b>Age Group 30-34</b> | 6.05                                                           | 6.11 | 5.44 | 4.38 | 3.50 | <b>5.44</b> | 3.50        | 6.11         | 310.90                                           | 376.16 | 366.58 | 224.39 | 159.05 | <b>310.90</b> | 159.05      | 376.16       |
| <i>Female</i>          | 6.07                                                           | 5.91 | 4.90 | 4.36 | 3.36 | <b>4.90</b> | 3.36        | 6.07         | 381.33                                           | 455.10 | 449.50 | 260.70 | 175.56 | <b>381.33</b> | 175.56      | 455.10       |
| <i>Male</i>            | 5.91                                                           | 6.13 | 5.80 | 4.33 | 3.50 | <b>5.80</b> | 3.50        | 6.13         | 236.82                                           | 293.32 | 280.10 | 184.20 | 137.90 | <b>236.82</b> | 137.90      | 293.32       |
| <b>Age Group 35-39</b> | 3.87                                                           | 3.97 | 3.78 | 3.14 | 2.54 | <b>3.78</b> | 2.54        | 3.97         | 332.82                                           | 409.80 | 391.15 | 249.28 | 176.87 | <b>332.82</b> | 176.87      | 409.80       |
| <i>Female</i>          | 3.39                                                           | 4.13 | 3.24 | 2.92 | 2.31 | <b>3.24</b> | 2.31        | 4.13         | 356.29                                           | 439.83 | 424.71 | 254.61 | 178.67 | <b>356.29</b> | 178.67      | 439.83       |
| <i>Male</i>            | 4.31                                                           | 3.81 | 4.31 | 3.31 | 2.63 | <b>3.81</b> | 2.63        | 4.31         | 301.61                                           | 372.56 | 349.94 | 238.25 | 170.47 | <b>301.61</b> | 170.47      | 372.56       |
| <b>Age Group 40-44</b> | 2.54                                                           | 3.07 | 2.00 | 1.85 | 1.81 | <b>2.00</b> | 1.81        | 3.07         | 305.25                                           | 384.77 | 368.15 | 240.07 | 181.51 | <b>305.25</b> | 181.51      | 384.77       |
| <i>Female</i>          | 2.18                                                           | 3.34 | 1.64 | 1.45 | 1.48 | <b>1.64</b> | 1.45        | 3.34         | 300.33                                           | 377.64 | 353.83 | 213.66 | 165.88 | <b>300.33</b> | 165.88      | 377.64       |
| <i>Male</i>            | 2.86                                                           | 2.79 | 2.25 | 2.21 | 2.15 | <b>2.25</b> | 2.15        | 2.86         | 303.90                                           | 384.76 | 375.47 | 262.45 | 191.92 | <b>303.90</b> | 191.92      | 384.76       |
| <b>Age Group 45-49</b> | 1.93                                                           | 2.25 | 2.13 | 1.39 | 1.28 | <b>1.93</b> | 1.28        | 2.25         | 266.86                                           | 331.64 | 318.08 | 216.39 | 169.65 | <b>266.86</b> | 169.65      | 331.64       |
| <i>Female</i>          | 1.74                                                           | 2.19 | 1.90 | 1.03 | 1.45 | <b>1.74</b> | 1.03        | 2.19         | 248.33                                           | 304.46 | 291.62 | 187.06 | 147.39 | <b>248.33</b> | 147.39      | 304.46       |
| <i>Male</i>            | 2.07                                                           | 2.32 | 2.30 | 1.71 | 1.03 | <b>2.07</b> | 1.03        | 2.32         | 284.18                                           | 355.60 | 342.17 | 244.09 | 188.76 | <b>284.18</b> | 188.76      | 355.60       |
| <b>Age Group 50-54</b> | 2.15                                                           | 1.30 | 1.33 | 0.80 | 1.14 | <b>1.30</b> | 0.80        | 2.15         | 223.25                                           | 283.49 | 267.63 | 185.14 | 150.96 | <b>223.25</b> | 150.96      | 283.49       |
| <i>Female</i>          | 1.93                                                           | 1.46 | 0.94 | 0.57 | 0.78 | <b>0.94</b> | 0.57        | 1.93         | 207.48                                           | 266.77 | 245.53 | 162.93 | 130.73 | <b>207.48</b> | 130.73      | 266.77       |
| <i>Male</i>            | 2.43                                                           | 1.01 | 1.73 | 1.08 | 1.59 | <b>1.59</b> | 1.01        | 2.43         | 237.37                                           | 299.64 | 291.06 | 209.99 | 171.70 | <b>237.37</b> | 171.70      | 299.64       |
| <b>Age Group 55-59</b> | 1.29                                                           | 1.36 | 1.04 | 1.07 | 1.00 | <b>1.07</b> | 1.00        | 1.36         | 181.18                                           | 235.89 | 226.12 | 164.64 | 139.38 | <b>181.18</b> | 139.38      | 235.89       |
| <i>Female</i>          | 0.79                                                           | 1.45 | 1.50 | 0.90 | 0.56 | <b>0.90</b> | 0.56        | 1.50         | 165.39                                           | 212.14 | 196.65 | 143.01 | 118.59 | <b>165.39</b> | 118.59      | 212.14       |
| <i>Male</i>            | 1.95                                                           | 1.24 | 0.44 | 1.29 | 1.59 | <b>1.29</b> | 0.44        | 1.95         | 198.62                                           | 262.74 | 260.65 | 190.29 | 162.79 | <b>198.62</b> | 162.79      | 262.74       |
| <b>Age Group 60+</b>   | 0.60                                                           | 0.70 | 0.72 | 0.52 | 0.51 | <b>0.60</b> | 0.51        | 0.72         | 118.78                                           | 139.84 | 137.15 | 111.21 | 107.61 | <b>118.78</b> | 107.61      | 139.84       |
| <i>Female</i>          | 0.52                                                           | 0.64 | 0.75 | 0.38 | 0.22 | <b>0.52</b> | 0.22        | 0.75         | 98.34                                            | 117.36 | 114.47 | 90.15  | 88.50  | <b>98.34</b>  | 88.50       | 117.36       |
| <i>Male</i>            | 0.71                                                           | 0.69 | 0.62 | 0.75 | 0.92 | <b>0.71</b> | 0.62        | 0.92         | 147.19                                           | 171.08 | 169.42 | 141.53 | 134.88 | <b>147.19</b> | 134.88      | 171.08       |
| <b>Province</b>        |                                                                |      |      |      |      |             |             |              |                                                  |        |        |        |        |               |             |              |
| <i>Eastern Cape</i>    | 2.58                                                           | 2.82 | 2.85 | 1.67 | 1.06 | <b>2.58</b> | 1.06        | 2.85         | 329.25                                           | 387.56 | 296.39 | 70.61  | 24.36  | <b>296.39</b> | 24.36       | 387.56       |
| <i>Free State</i>      | 3.81                                                           | 4.00 | 2.93 | 1.81 | 2.18 | <b>2.93</b> | 1.81        | 4.00         | 272.58                                           | 343.70 | 321.79 | 247.79 | 136.00 | <b>272.58</b> | 136.00      | 343.70       |
| <i>Gauteng</i>         | 3.13                                                           | 3.83 | 3.18 | 2.72 | 2.13 | <b>3.13</b> | 2.13        | 3.83         | 238.65                                           | 331.46 | 345.94 | 252.08 | 182.14 | <b>252.08</b> | 182.14      | 345.94       |
| <i>Kwazulu-Natal</i>   | 4.82                                                           | 4.00 | 3.28 | 2.24 | 2.63 | <b>3.28</b> | 2.24        | 4.82         | 102.15                                           | 80.70  | 87.70  | 81.25  | 88.68  | <b>87.70</b>  | 80.70       | 102.15       |
| <i>Limpopo</i>         | 1.45                                                           | 1.42 | 0.70 | 0.59 | 0.50 | <b>0.70</b> | 0.50        | 1.45         | 48.90                                            | 79.10  | 66.77  | 46.80  | 35.89  | <b>48.90</b>  | 35.89       | 79.10        |
| <i>Mpumalanga</i>      | 3.99                                                           | 4.00 | 3.51 | 1.57 | 1.11 | <b>3.51</b> | 1.11        | 4.00         | 46.26                                            | 83.03  | 117.74 | 43.78  | 43.16  | <b>46.26</b>  | 43.16       | 117.74       |
| <i>North West</i>      | 1.78                                                           | 2.14 | 1.44 | 1.16 | 1.37 | <b>1.44</b> | 1.16        | 2.14         | 114.16                                           | 129.02 | 122.23 | 104.73 | 124.13 | <b>122.23</b> | 104.73      | 129.02       |
| <i>Northern Cape</i>   | 3.83                                                           | 2.96 | 2.11 | 3.60 | 1.42 | <b>2.96</b> | 1.42        | 3.83         | 336.25                                           | 343.91 | 327.64 | 320.52 | 262.53 | <b>327.64</b> | 262.53      | 343.91       |
| <i>Western Cape</i>    | 2.45                                                           | 1.87 | 1.79 | 1.23 | 1.26 | <b>1.79</b> | 1.23        | 2.45         | 76.57                                            | 69.65  | 62.67  | 50.41  | 49.60  | <b>62.67</b>  | 49.60       | 76.57        |
