# Supplementary material for: Prevalence and incidence rates of laboratory-confirmed hepatitis B infection in South Africa, 2015 to 2019
Source: PubMed Central journal article supplement (PMC8739689; doi:10.1186/s12889-021-12391-3), 2022-01-06
Supplement: 12889_2021_12391_MOESM5_ESM.pdf [file 12889_2021_12391_MOESM5_ESM.pdf]

Supplementary Table 5: Annual HBCoreIgM test positivity rates by gender, age group and province, 2015 to 2019

| Testing Year           | 2015 (%) | 2016 (%) | 2017 (%) | 2018 (%) | 2019 (%) | 2015 - 2019 |              |              |                            |                                |                                   |
|------------------------|----------|----------|----------|----------|----------|-------------|--------------|--------------|----------------------------|--------------------------------|-----------------------------------|
|                        |          |          |          |          |          | Median (%)  | Lower 95% CI | Upper 95% CI | Kendall's tau <sup>a</sup> | Kendall's p-value <sup>a</sup> | Mann-Whitney p-value <sup>b</sup> |
| <b>Annual</b>          | 1.92     | 1.57     | 1.35     | 1.47     | 1.68     | <b>1.57</b> | 1.35         | 1.92         | -0.2                       | 0.8065                         | -                                 |
| <b>Female</b>          | 1.74     | 1.48     | 1.20     | 1.38     | 1.57     | <b>1.48</b> | 1.20         | 1.74         | -0.2                       | 0.8065                         | -                                 |
| <b>Male</b>            | 2.16     | 1.70     | 1.54     | 1.59     | 1.82     | <b>1.70</b> | 1.54         | 2.16         | -0.2                       | 0.8065                         | 0.0952                            |
| <b>Age Group 0-4</b>   | 0.15     | 0.25     | 0.15     | 0.27     | 0.38     | <b>0.25</b> | 0.15         | 0.38         | +0.8                       | 0.0864                         | -                                 |
| <i>Female</i>          | 0.00     | 0.17     | 0.16     | 0.58     | 0.21     | <b>0.17</b> | 0.00         | 0.58         | -                          | -                              | -                                 |
| <i>Male</i>            | 0.30     | 0.35     | 0.16     | 0.00     | 0.53     | <b>0.30</b> | 0.00         | 0.53         | -                          | -                              | 0.8333                            |
| <b>Age Group 5-9</b>   | 0.35     | 0.24     | 0.38     | 0.18     | 0.00     | <b>0.24</b> | 0.00         | 0.38         | -0.6                       | 0.2207                         | -                                 |
| <i>Female</i>          | 0.43     | 0.21     | 0.24     | 0.36     | 0.00     | <b>0.24</b> | 0.00         | 0.43         | -                          | -                              | -                                 |
| <i>Male</i>            | 0.26     | 0.27     | 0.55     | 0.00     | 0.00     | <b>0.26</b> | 0.00         | 0.55         | -                          | -                              | >0.9999                           |
| <b>Age Group 10-14</b> | 0.26     | 0.26     | 0.17     | 0.24     | 0.30     | <b>0.26</b> | 0.17         | 0.30         | 0.0                        | >0.9999                        | -                                 |
| <i>Female</i>          | 0.00     | 0.14     | 0.29     | 0.40     | 0.00     | <b>0.14</b> | 0.00         | 0.40         | -                          | -                              | -                                 |
| <i>Male</i>            | 0.74     | 0.47     | 0.00     | 0.00     | 0.72     | <b>0.47</b> | 0.00         | 0.74         | -                          | -                              | 0.3819                            |
| <b>Age Group 15-19</b> | 1.80     | 1.60     | 1.53     | 1.71     | 1.21     | <b>1.60</b> | 1.21         | 1.80         | -0.6                       | 0.2207                         | -                                 |
| <i>Female</i>          | 1.96     | 1.70     | 1.58     | 1.90     | 1.63     | <b>1.70</b> | 1.58         | 1.96         | -                          | -                              | -                                 |
| <i>Male</i>            | 1.45     | 1.36     | 1.33     | 1.27     | 0.41     | <b>1.33</b> | 0.41         | 1.45         | -                          | -                              | <b>0.0079*</b>                    |
| <b>Age Group 20-24</b> | 4.89     | 3.90     | 3.31     | 3.12     | 2.92     | <b>3.31</b> | 2.92         | 4.89         | -1.0                       | <b>0.0275*</b>                 | -                                 |
| <i>Female</i>          | 4.08     | 3.10     | 2.61     | 2.66     | 2.71     | <b>2.71</b> | 2.61         | 4.08         | -                          | -                              | -                                 |
| <i>Male</i>            | 7.04     | 6.59     | 5.70     | 4.33     | 3.43     | <b>5.70</b> | 3.43         | 7.04         | -                          | -                              | <b>0.0159*</b>                    |
| <b>Age Group 25-29</b> | 3.58     | 2.96     | 2.44     | 2.68     | 4.19     | <b>2.96</b> | 2.44         | 4.19         | 0.0                        | >0.9999                        | -                                 |
| <i>Female</i>          | 2.72     | 2.31     | 1.84     | 2.06     | 3.36     | <b>2.31</b> | 1.84         | 3.36         | -                          | -                              | -                                 |
| <i>Male</i>            | 5.37     | 4.29     | 3.64     | 3.89     | 5.69     | <b>4.29</b> | 3.64         | 5.69         | -                          | -                              | <b>0.0079*</b>                    |
| <b>Age Group 30-34</b> | 1.95     | 1.62     | 1.48     | 1.95     | 2.20     | <b>1.95</b> | 1.48         | 2.20         | 0.4                        | 0.4624                         | -                                 |
| <i>Female</i>          | 1.59     | 1.30     | 1.09     | 1.67     | 1.91     | <b>1.59</b> | 1.09         | 1.91         | -                          | -                              | -                                 |
| <i>Male</i>            | 2.50     | 2.09     | 2.07     | 2.35     | 2.54     | <b>2.35</b> | 2.07         | 2.54         | -                          | -                              | <b>0.0079*</b>                    |
| <b>Age Group 35-39</b> | 1.16     | 0.97     | 0.97     | 1.26     | 1.43     | <b>1.16</b> | 0.97         | 1.43         | 0.4                        | 0.4624                         | -                                 |
| <i>Female</i>          | 0.95     | 0.94     | 0.76     | 1.15     | 1.29     | <b>0.95</b> | 0.76         | 1.29         | -                          | -                              | -                                 |
| <i>Male</i>            | 1.43     | 1.02     | 1.23     | 1.39     | 1.54     | <b>1.39</b> | 1.02         | 1.54         | -                          | -                              | 0.0556                            |
| <b>Age Group 40-44</b> | 0.83     | 0.80     | 0.54     | 0.77     | 1.00     | <b>0.80</b> | 0.54         | 1.00         | 0.0                        | >0.9999                        | -                                 |
| <i>Female</i>          | 0.73     | 0.88     | 0.46     | 0.68     | 0.89     | <b>0.73</b> | 0.46         | 0.89         | -                          | -                              | -                                 |
| <i>Male</i>            | 0.94     | 0.72     | 0.60     | 0.84     | 1.12     | <b>0.84</b> | 0.60         | 1.12         | -                          | -                              | 0.5476                            |
| <b>Age Group 45-49</b> | 0.72     | 0.68     | 0.67     | 0.64     | 0.75     | <b>0.68</b> | 0.64         | 0.75         | -0.2                       | 0.8065                         | -                                 |
| <i>Female</i>          | 0.70     | 0.72     | 0.65     | 0.55     | 0.98     | <b>0.70</b> | 0.55         | 0.98         | -                          | -                              | -                                 |
| <i>Male</i>            | 0.73     | 0.65     | 0.67     | 0.70     | 0.55     | <b>0.67</b> | 0.55         | 0.73         | -                          | -                              | 0.7381                            |
| <b>Age Group 50-54</b> | 0.96     | 0.46     | 0.50     | 0.43     | 0.76     | <b>0.50</b> | 0.43         | 0.96         | -0.2                       | 0.8065                         | -                                 |
| <i>Female</i>          | 0.93     | 0.55     | 0.38     | 0.35     | 0.60     | <b>0.55</b> | 0.35         | 0.93         | -                          | -                              | -                                 |
| <i>Male</i>            | 1.03     | 0.34     | 0.59     | 0.51     | 0.93     | <b>0.59</b> | 0.34         | 1.03         | -                          | -                              | 0.7302                            |
| <b>Age Group 55-59</b> | 0.71     | 0.58     | 0.46     | 0.65     | 0.72     | <b>0.65</b> | 0.46         | 0.72         | 0.2                        | 0.8065                         | -                                 |
| <i>Female</i>          | 0.47     | 0.68     | 0.76     | 0.63     | 0.47     | <b>0.63</b> | 0.47         | 0.76         | -                          | -                              | -                                 |
| <i>Male</i>            | 0.98     | 0.47     | 0.17     | 0.68     | 0.97     | <b>0.68</b> | 0.17         | 0.98         | -                          | -                              | 0.7381                            |
| <b>Age Group 60+</b>   | 0.50     | 0.50     | 0.53     | 0.47     | 0.47     | <b>0.50</b> | 0.47         | 0.53         | -0.4                       | 0.4624                         | -                                 |
| <i>Female</i>          | 0.53     | 0.55     | 0.66     | 0.42     | 0.24     | <b>0.53</b> | 0.24         | 0.66         | -                          | -                              | -                                 |
| <i>Male</i>            | 0.48     | 0.40     | 0.36     | 0.53     | 0.69     | <b>0.48</b> | 0.36         | 0.69         | -                          | -                              | 0.8810                            |
| <b>Province</b>        |          |          |          |          |          |             |              |              |                            |                                |                                   |
| <i>Eastern Cape</i>    | 0.79     | 0.73     | 0.96     | 2.37     | 4.34     | <b>0.96</b> | 0.73         | 4.34         | +0.8                       | 0.0864                         | -                                 |
| <i>Free State</i>      | 1.40     | 1.16     | 0.91     | 0.73     | 1.60     | <b>1.16</b> | 0.73         | 1.60         | -0.2                       | 0.8065                         | -                                 |
| <i>Gauteng</i>         | 1.31     | 1.16     | 0.92     | 1.08     | 1.17     | <b>1.16</b> | 0.92         | 1.31         | -0.2                       | 0.8065                         | -                                 |
| <i>Kwazulu-Natal</i>   | 4.72     | 4.96     | 3.74     | 2.76     | 2.97     | <b>3.74</b> | 2.76         | 4.96         | -0.6                       | 0.2207                         | -                                 |
| <i>Limpopo</i>         | 2.98     | 1.80     | 1.04     | 1.26     | 1.40     | <b>1.40</b> | 1.04         | 2.98         | -0.4                       | 0.4624                         | -                                 |
| <i>Mpumalanga</i>      | 8.62     | 4.81     | 2.98     | 3.59     | 2.57     | <b>3.59</b> | 2.57         | 8.62         | -0.8                       | 0.0864                         | -                                 |
| <i>North West</i>      | 1.56     | 1.66     | 1.18     | 1.11     | 1.10     | <b>1.18</b> | 1.10         | 1.66         | -0.8                       | 0.0864                         | -                                 |
| <i>Northern Cape</i>   | 1.14     | 0.86     | 0.64     | 1.12     | 0.54     | <b>0.86</b> | 0.54         | 1.14         | -0.6                       | 0.2207                         | -                                 |
| <i>Western Cape</i>    | 3.19     | 2.68     | 2.85     | 2.45     | 2.53     | <b>2.68</b> | 2.45         | 3.19         | -0.1                       | 0.2207                         | -                                 |

<sup>a</sup> Kendall's tau and p-values of correlation analyses in trends of HBCoreIgM test positivity rates over time

<sup>b</sup> Mann-Whitney p-values generated from comparison of HBCoreIgM test positivity rates between females and males by age group

\*P-values < 0.05 in bold
